## Corticosteroids, Heart Failure, and Hypertension: A Role for Immune Cells?

Jimmy Z. Shen and Morag J. Young

Prince Henry's Institute of Medical Research (J.Z.S., M.J.Y.); Monash Medical Centre (J.Z.S.); and Departments of Physiology (M.J.Y.), and Medicine (J.Z.S., M.J.Y.) Monash University, Clayton 3168, Victoria, Australia

Aldosterone and its receptor the mineralocorticoid receptor (MR) are best known for their regulation of fluid and electrolyte homeostasis in epithelial cells. However, it is now clear that MR are also expressed in a broad range of nonepithelial tissues including the cardiovascular system. In the heart and vascular tissues, pathological activation of MR promotes cardiovascular inflammation and remodeling for which there is increasing evidence that macrophages and other immune cells (e.g. T cells and dendritic cells) play a significant role. While the glucocorticoids and their receptors have well-described antiinflammatory actions in immune cells, a role for aldosterone and/or the MR in these cells is largely undefined. Emerging evidence, however, suggests that MR signaling may directly or indirectly promote proinflammatory responses in these immune cells. This review will discuss the current understanding of the role of corticosteroid receptors in macrophages and their effect on cardiovascular diseases involving inflammation. (*Endocrinology* 153: 5692–5700, 2012)

**M**ore people die from cardiovascular disease worldwide than any other cause with an estimated 17.3 million deaths per year (1). The prognosis of symptomatic heart failure remains dismal with average 1-yr and 5-yr mortality rates of 35% to 50%, respectively, despite major therapeutic advances (2–4). Moreover, the economic burden of heart failure is increasing globally in terms of healthcare requirements, disability, and premature deaths (5, 6).

Vascular and target organ inflammation from tissue injury has long been recognized to underlie the complex pathophysiology of cardiovascular disease regardless of the initiating event such as ischemia, autoimmunity, or activation of the renin-angiotensin-aldosterone system. The immune system and endogenous corticosteroids are important modulators of this inflammatory process with recent studies describing a novel role for the macrophage mineralocorticoid receptor (MR) in modulating cardiac remodeling and systolic blood pressure (7–9). The aim of this review is to highlight the growing role of the immune system in modulating the outcome of MR signaling in

cardiovascular tissues and of MR signaling in modulating the immune response.

### Corticosteroids and Their Receptors

The corticosteroid receptors, glucocorticoid and mineralocorticoid receptors (GR and MR) are members of the steroid hormone receptor subgroup of the nuclear receptor superfamily of ligand-activated transcription factors (10, 11). A range of nongenomic responses have also been described for steroid hormone receptor and involve rapid intracellular signaling responses (12, 13). MR bind both endogenous glucocorticoids (cortisol in human, corticosterone in rodent) and mineralocorticoids (aldosterone) with high affinity (14). However, the epithelial MR selectivity for the physiological mineralocorticoids (e.g. aldosterone) is conferred by the enzyme 11 $\beta$ -hydroxysteroid dehydrogenase type 2 (11 $\beta$ HSD2) conversion of cortisol to cortisone, which is inactive at the MR (15, 16). In contrast, the absence of 11 $\beta$ HSD2 in nonepithelial tissues

ISSN Print 0013-7227 ISSN Online 1945-7170  
Printed in U.S.A.

Copyright © 2012 by The Endocrine Society

doi: 10.1210/en.2012-1780 Received July 25, 2012. Accepted October 2, 2012.

First Published Online November 2, 2012

Abbreviations: DOC, Deoxycorticosterone; GR, glucocorticoid receptor; 11 $\beta$ HSD2, 11 $\beta$ -hydroxysteroid dehydrogenase type 2; MR, mineralocorticoid receptor; MRKO, MR knockout; NAME, nitro-arginine methyl ester; NF- $\kappa$ B, nuclear transcription factor- $\kappa$ B; PA, primary aldosteronism; VSMC, vascular smooth muscle cell.

(e.g. cardiomyocytes, monocytes/macrophages) allows physiological glucocorticoids to modulate MR signaling in these tissues. The specific role of MR signaling in these nonepithelial tissues is now recognized as an important mediator of cardiac pathology and a role for the nonepithelial MR as a second receptor for cortisol in normal physiology is increasingly being appreciated.

The corticosteroid hormones, via their effects on MR and GR, play an important role in cardiovascular inflammation. GR signaling is predominantly antiinflammatory in many systemic and local disease models, mainly due to its potent immunosuppressive effects. Despite the postulated antiinflammatory benefits in cardiovascular tissues, adverse cardiovascular effects are seen in glucocorticoid excess states such as Cushing's syndrome and patients on therapeutic exogenous glucocorticoids. The effect of glucocorticoid excess on cardiovascular disease is complex and multifactorial, and the independent effects of GR signaling remain difficult to interrogate (reviewed in Ref. 17). Whereas genomic and nongenomic MR regulation of proinflammatory and profibrotic pathways have been described in vascular endothelial and smooth muscle cells (18–20) and cardiomyocytes (21, 22), the exact role of the MR in immune cells such as macrophages has not been completely elucidated. Recent studies, however, suggest that MR signaling in macrophages also mediates proinflammatory and profibrotic gene expression (7, 9). This review will focus on MR-mediated cardiovascular pathology and the modulating role of the immune system on the underlying inflammation.

## MR Activation and Cardiovascular Disease

Sustained activation of the MR by elevated aldosterone levels leads to cardiovascular dysfunction and pathology. Primary aldosteronism (PA) is characterized by autonomous mineralocorticoid excess and is a common cause of secondary hypertension (23, 24). Patients with primary aldosteronism experience disproportionately more cardiovascular events than those with essential hypertension matched for blood pressure levels (25). Under normal circumstances, MR signaling in renal tubules leads to sodium and water retention and thus maintains extracellular volume and blood pressure. Aldosterone excess mediates hypertension not only via potentiating renal effects but also via MR in the central nervous system (26, 27) and in the vascular wall. Activation of vascular MR directly regulates vascular tone and thus total peripheral resistance (28); in the longer term, elevated aldosterone contributes to remodeling of the vessel wall which, in turn, contributes to the maintenance of a higher blood pressure (19, 29, 30).

Vascular smooth muscle cell (VSMC) MR can also independently regulate blood pressure in aged animals in which changes in renal sodium handling and vascular structure are unaffected (30).

The detrimental effects of MR activation in the heart are also clearly illustrated by clinical studies using MR antagonists. Large randomized controlled trials (RALES, EPHESUS, and EMPHASIS) have demonstrated the unequivocal mortality and morbidity benefits of MR antagonist treatment in both mild and moderately severe symptomatic heart failure, implicating MR signaling as a key mediator of heart disease (32–34). However, the ligand responsible for MR activation had been the subject of debate given that circulating levels of aldosterone in these patients were barely elevated (35). This raises the possibility that the cardiovascular benefits conferred by aldosterone antagonists were at least partly independent of aldosterone itself and lend support to a role for cortisol in pathological states such as heart failure (36). Cardiac MR expression has also been found to be increased in failing hearts in humans and experimental animals (37, 38). The clinical benefits of MR antagonists are further supported by extensive animal studies which illustrate the effects of an MR activated state on cardiac inflammation and remodeling after aldosterone or deoxycorticosterone (DOC) plus salt (aldosterone/salt, DOC/salt) (39–41) or angiotensin II administration and/or L-nitro-arginine methyl ester (angiotensin II/L-NAME) (9, 42, 43). These studies again show that mineralocorticoid-dependent and -independent MR activation promote tissue inflammation, remodeling, and left ventricular dysfunction. The current review aims to highlight the interactions between the immune system and cardiovascular tissue in both the clinical setting and these experimental models.

## MR Signaling in Cardiac Inflammation and Remodeling

Progressive heart failure is determined by pathological cardiac remodeling that occurs after tissue injury from myocardial infarct, acute or chronic inflammation, pressure and volume overload, and activation of the renin-angiotensin-aldosterone system (44). MR activation promotes tissue oxidative stress and inflammation, which is characterized by a perivascular mononuclear infiltrate and increased adhesion markers with chemokine and cytokine expression (39, 45, 46) (Fig. 1). This is a continuous process with subsequent remodeling and interstitial fibrosis.

Myocardial reduced nicotinamide adenine dinucleotide phosphate oxidase is a source of reactive oxygen species mediating oxidative stress that plays a significant

## Role of immune cells in MR mediated cardiac remodelling

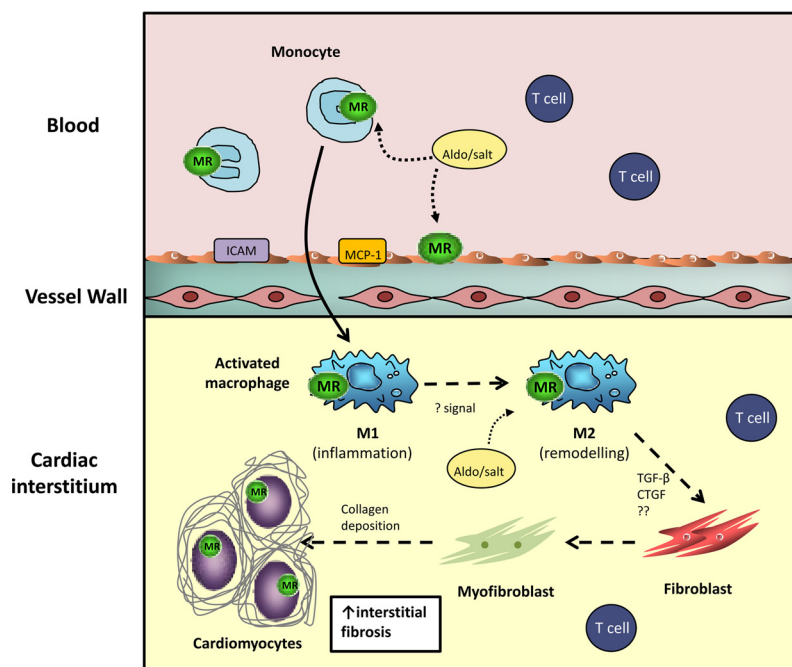

**FIG. 1.** Proposed schema of the role of immune cells in MR-mediated cardiac remodeling. Activation of MR by aldosterone and salt leads to expression of vascular adhesion markers (e.g. ICAM) and chemokines (e.g. MCP-1). Recruitment and activation of M1 pro-inflammatory macrophage follows which further generate cytokines to amplify and perpetuate tissue inflammation and damage in early phase. An as yet undefined regulatory signal promotes M2 pro-fibrotic (wound healing) macrophage recruitment and proliferation in the continuous presence of aldosterone and salt. Activation and differentiation of cardiac fibroblasts into myofibroblasts in response to growth factors [e.g. TGF- $\beta$ , connective tissue growth factor (CTGF)] facilitates exuberant collagen deposition leading to interstitial fibrosis. Although there is an increase in T cell infiltration, their exact modulating role in the MR activation model remains uncharacterised.

role in cardiac pathology. Increased reduced nicotinamide adenine dinucleotide phosphate oxidase expression and activity are localized to cardiomyocytes and endothelium in heart failure (47, 48), and these are thought to activate redox-sensitive signaling pathways such as Src kinases and MAPK (ERK1/2) in pressure overload hypertrophy and failure (49). Inflammatory and fibrotic responses to aldosterone were blunted in Nox2-null mice, which were also shown to have reduced nuclear transcription factor- $\kappa$ B (NF- $\kappa$ B) activation (50). It has also been proposed that cardiomyocyte MR activation potentially leads to dysregulation of cellular handling of calcium, magnesium, and other ions, which induces high mitochondrial calcium and reactive oxygen species, resulting in necrosis and replacement fibrosis (51). Consistent with these studies, cardiomyocyte MR-null mice showed blunted oxidative stress and tissue injury responses to ischemia, suggesting that MR activation in these cells drives key oxidative responses (52, 53).

Activation and proliferation of fibroblasts in response to inflammatory cytokines and growth factors in high

mineralocorticoid states promotes collagen deposition (fibrosis) leading to structural and functional remodeling in the myocardium (45, 46, 54). Repeated injury occurs with persistent inflammation and also leads to extensive interstitial scarring (55), which is reversible by MR antagonists (40, 56). These models have also established that the remodeling benefits of MR blockade are independent of their blood pressure-lowering effects as well as plasma aldosterone level (57, 58). MR signaling in cardiomyocytes has also been shown to up-regulate genes involved in extracellular matrix remodeling (59, 60). Recent studies with cardiomyocyte MR-null mice demonstrate protection from cardiac failure after pressure overload from transaortic constriction or coronary artery ligation (52, 61). Whereas the first study shows no protective effect on cardiac inflammation or fibrosis, the latter demonstrates improvement in cardiac contractility, reduction in oxidative stress (see below), and protection from adverse remodeling with loss of cardiomyocyte MR. Similarly, cardiomyocyte MR-null mice are also protected from DOC/salt cardiac remodeling (53). Together, these studies suggest that cardiomyocyte MR has a role in the regulation of structural and functional remodeling. In contrast, the lack of cardiac protection in fibroblast MR-null mice is consistent with the lack of functional MR in these cells (61).

Immune cells have now been shown to play a critical role in mediating proinflammatory and profibrotic effects in the setting of MR activation in cardiac tissues. MR are expressed in immune cells of the myeloid lineage including monocytes/macrophages (62), a subset of dendritic cells (63), and potentially neutrophils (64), making them non-classical targets of aldosterone and potentially cortisol due to the absence of 11 $\beta$ HSD2 (65). A significant inflammatory component with marked macrophage recruitment had been characterized in cardiovascular remodeling in MR-mediated and other cardiac pathophysiology (66–68). MR signaling induces oxidative stress in macrophages (69) via activation of NF- $\kappa$ B, which generates a proinflammatory macrophage phenotype (M1), responsible for amplifying tissue inflammation with consequent injury (39, 45). Although the dynamic nature of the mac-

rophage phenotype in tissue injury and healing is not fully understood in the DOC/salt model, tissue repair and remodeling processes in other experimental disease models suggest M1 is subsequently replaced by profibrotic macrophage phenotype (M2) likely in response to tissue signals or T cell cytokines (70–72). M2 releases profibrotic factors involved in cardiac remodeling such as TGF- $\beta$ , which promotes fibroblast activation and collagen deposition (73–75) (Fig. 1). We and others have demonstrated an independent and central role for MR in macrophages (7–9). Selective deletion of MR in these cells protects against adverse cardiac remodeling in the DOC/salt and angiotensin II or angiotensin II/L-NAME models of hypertension and, interestingly, also reduces infarct volume in the cerebral ischemia model (76). These highlight a central role for macrophage MR in the pathogenesis of tissue remodeling.

An important modulator of these macrophage functions is the T cell-macrophage interaction (71, 73, 74). However, the exact role of T cells in DOC/salt model of cardiac remodeling is uncertain. Potential mechanisms include direct regulation of dendritic cell MR by aldosterone to influence the differentiation of the CD4<sup>+</sup> T helper cell (a subset of T cells) (63). CXCR4 antagonism was recently demonstrated to protect mice treated with DOC/salt from cardiac fibrosis and hypertension. Because CXCR4, a chemokine receptor, is widely expressed on T cells, this study suggests an important mechanistic role for T cells in MR-mediated disease (77). Studies from various disease models indicate that CD4<sup>+</sup> T helper cells perform a key role in modulating the immune cell response in tissue inflammation and remodeling, *e.g.* T helper 1 (T<sub>H</sub>1) and T helper 2 cells (T<sub>H</sub>2) driving M1 and M2, respectively (78–81). Adoptive transfer of regulatory T helper cell (T<sub>reg</sub>) has also been shown to be cardiac protective in hypertensive mice treated with transaortic constriction by down-regulating immune response (82). The nature of the interaction between the various members of the immune system in MR-mediated pathology is an exciting and emerging area of research.

Therefore, MR signaling, in the setting of inappropriately high salt, mediates oxidative stress in various cell types in the myocardium, resulting in activation of the immune system and chronic inflammation, which initiates concurrent tissue repair and remodeling.

### Immune Cells in MR-Mediated Cardiac Pathology: Insights from Transgenic Mice Models

Recently, Rickard *et al.* (7) and others (8, 9) demonstrated a role for macrophage MR and provided insights

into macrophage phenotypes in cardiovascular remodeling by analyzing the effects of DOC/salt or angiotensin II/L-NAME treatment on transgenic mice with selective deletion in myeloid MR [myeloid MR knockout (MRKO)]. Given that cre recombinase is driven by the Lysozyme M promoter, this deletion affects cells of myeloid lineage, in particular monocytes, macrophages, and a subset of dendritic cells (83)

Peritoneal MR-null macrophages, elicited by thioglycolate stimulation, show reduced M1 but elevated M2 marker expression (9). Taken together with the demonstration of reduced inducible NOS-positive macrophages in hearts from L-NAME/salt-treated myeloid MRKO mice (8) as well as an earlier study by Keidar *et al.* (69), these data verify that MR signaling contributes to expression of proinflammatory M1 cytokines in macrophages. Although there is a good suggestion that macrophages from myeloid MRKO adopt a typical M2 phenotype (9), other *in vivo* studies demonstrate a reduction in M1 markers but unchanged (rather than increased) M2 markers (7, 8), highlighting some variation in *in vivo* and *ex vivo* responses of the different macrophage populations. These *in vivo* studies raise the possibility that macrophages from myeloid MRKO mice may be atypical M2 or M2-like (regulatory macrophages) phenotype because the mice were protected from cardiac fibrosis. In support, stimulation of myeloid MRKO macrophages with glucocorticoid, typically known to polarize macrophages toward M2-like phenotypes (73, 74), results in synergistic expression of M2 markers (9). This also illustrates the opposing effects of MR and GR signaling in macrophages. Therefore, more *in vivo* macrophage data are needed to verify the phenotype and function in the context of myeloid MRKO or general MR antagonism. It is likely that the chronic MR activation due to aldosterone or DOC in wild-type cardiac tissue yields a dynamic mixture of typical M1 and M2, and intermediate phenotypes at different phases of the remodeling process resulting in aberrant remodeling and fibrosis. Interrupting this process by generating atypical M2 or M2-like macrophages by MR KO intuitively accounts for the benefits seen in these studies (7–9).

The effect of myeloid MR deletion on dendritic cells in these models has not been explored. Studies using mice deficient in dendritic cells given DOC/salt model would enable assessment of the role of dendritic cells and may indirectly provide clues into the role of T cells in modulating immune responses to DOC/salt cardiovascular tissue remodeling.

### MR-Mediated Inflammation and Remodeling in the Vessel Wall

Comprehensive reviews on MR signaling in the vessel wall have previously been published (29, 84). Vascular

### Role of immune cells in MR mediated hypertension

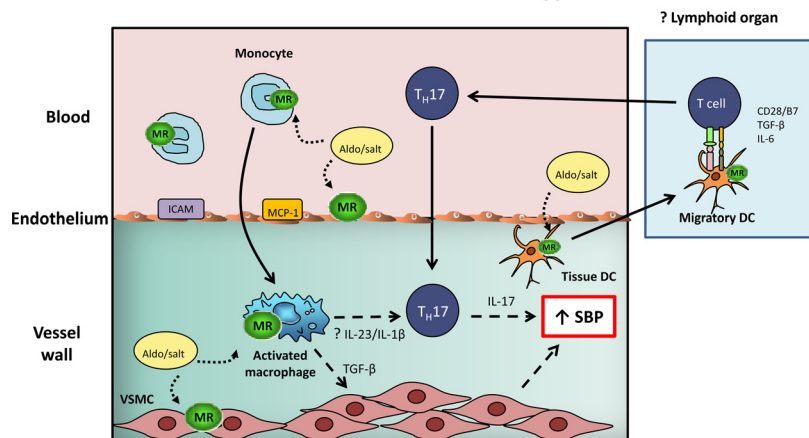

**FIG. 2.** Proposed schema of the role of immune cells in MR mediated hypertension. Initial vascular inflammation due to MR signaling from aldosterone and salt promotes vascular dendritic cell activation and migration to the proposed secondary lymphoid organ as well as recruitment and activation of macrophage into the vessel wall. Antigen presentation to naive CD4+ T cell in the context of costimulatory molecules and TGF- $\beta$  and IL-6 promotes differentiation into TH17 which migrate out and into the vessel wall. Further essential priming of TH17 with IL-23 or IL-1 $\beta$ , produced by the proposed recruited macrophage, enables IL-17 expression and secretion. This amplifies vascular inflammation leading to systolic hypertension. Vascular remodeling mediated by direct or indirect MR activation on vascular smooth muscle cells contributes to the maintenance of systemic hypertension.

inflammation as a result of MR activation promotes recruitment of monocytes and lymphocytes via expression of vascular adhesion markers, chemokines, and cytokines (Fig. 2). Activation of the vascular NF- $\kappa$ B and Rho-kinase signaling pathways by oxidative stress is thought to play an additional role. There is increasing evidence for a role for activated T cells in mediating vascular inflammation and hypertension in the setting of aldosterone treatment (85, 86).

Remodeling of the vessel wall contributes to the underlying pathophysiology of MR-mediated hypertension. Direct role of VSMC MR in blood pressure regulation has been demonstrated using mice with SMC-specific MR deficiency (30). MR signaling in VSMC stimulates migration, proliferation, and secretion of extracellular matrix (reviewed in Ref. 29). Multiple factors such as angiotensin II, platelet derived growth factor, endothelin-1, and placental growth factor interact with MR and activate both genomic and nongenomic MR signaling pathways to result in remodeling (29, 87, 88). This leads to vascular fibrosis and stiffness that is characteristic of longstanding hypertension, particularly in patients with untreated and/or unrecognized PA.

### Role of Macrophages in MR-Mediated Hypertension

Previous animal models have implicated macrophages as key players mediating vascular inflammation and hypertension. Mice studies employing techniques to exclude

the presence of macrophages in tissues demonstrated reduced vascular inflammation, decreased oxidative stress and remodeling, and protection from hypertension when treated with angiotensin II (89, 90). A role for macrophage MR signaling in blood pressure regulation has also been illustrated in studies involving macrophage MR deletion. These mice are clearly protected from DOC/salt-induced hypertension (7) but not in angiotensin II and/or L-NAME-dependent hypertension (8, 9). These differences may reflect the direct vascular endothelial oxidative stress and inflammatory effects of L-NAME, independent of MR activation. Studies from this laboratory (7) suggest that macrophage MR play a pathogenic role in oxidative stress, inflammation, and vascular dysfunction, thus exacerbating hypertension. Macrophages are a rich source of TGF- $\beta$ , which is potentially up-regulated during MR-mediated vascular

inflammation and injury. Recent *in vivo* studies demonstrate the ability of TGF- $\beta$  to stimulate VSMC proliferation via downstream Smad3 signaling (91, 92). Thus, in addition to mediating vascular inflammation, macrophages may play a direct role in vascular remodeling and thus contribute to the persistence of hypertension.

### Role of T cells in MR-Mediated Hypertension

There is mounting evidence for a role for T cells in hypertension. Guzik *et al.* (85) demonstrated that RAG-1<sup>-/-</sup> mice (lacking T and B cells) are protected from both angiotensin II and DOC/salt-induced vascular inflammation and hypertension and that this can be reversed by adoptive transfer of T cells. However, a role for macrophages was not investigated. Madhur *et al.* (86) subsequently illustrated that infiltrating T cells in the vascular wall may be a T<sub>H</sub>17 subset by using *IL-17*<sup>-/-</sup> mice and showing loss of a pressor effect and preserved vascular function in response to angiotensin II. T<sub>H</sub>17 is a differentiated effector T helper cell, increasingly recognized for its role in many chronic inflammatory/autoimmune diseases (inflammatory bowel disease, rheumatoid arthritis, *etc.*) (93). The provision of IL-6 and TGF- $\beta$  by dendritic cells is critical for this T<sub>H</sub>17 differentiation (94). However, IL-17 production is enabled only after further priming by cyto-

kines such as IL-23 or IL-1 $\beta$  (95, 96). Because macrophages are known to be a rich source of IL-23 or IL-1 $\beta$ , whether they interact with T<sub>H</sub>17 to promote the final functional phenotype in vascular tissues is currently uncertain. A recent *ex vivo* study demonstrated bone marrow-derived dendritic cells treated with aldosterone are able to prime naive CD4<sup>+</sup> T cells and promote T<sub>H</sub>17 differentiation (63). This highlights the functional significance of MR signaling in myeloid dendritic cells (97, 98) and the ability of aldosterone to indirectly promote T<sub>H</sub>17 differentiation. Vinh *et al.* (99) demonstrated the critical role of costimulatory molecules (CD28/B7) in angiotensin II and DOC/salt-mediated hypertension, which points to the existence of T cell priming by dendritic cells. Thus one may propose the pathway of T<sub>H</sub>17 induction in Madhur's study (Fig. 2), which was not specifically designed to investigate the nature of the presented antigens or the specificity for T<sub>H</sub>17 priming.

T<sub>reg</sub> are suppressors of T<sub>H</sub>1, T<sub>H</sub>2, and T<sub>H</sub>17 likely via effects of IL-10 (100). They are primed in an environment rich in TGF- $\beta$  and retinoic acid in the absence of IL-6, and at the expense of effector T cells, particularly T<sub>H</sub>17 (101). The importance of the balance or ratio of T<sub>H</sub>17 to T<sub>reg</sub> has been illustrated in many autoimmune/inflammatory diseases such as systemic lupus erythematosus, autoimmune arthritis, and IgA nephropathy (102–104). From a therapeutic perspective, it is worthy to note that mice given angiotensin II or aldosterone treatment demonstrate a reduction in Foxp3<sup>+</sup> T<sub>reg</sub> and a reciprocal increase in CD3<sup>+</sup> T cell infiltration ( $\uparrow$  CD3<sup>+</sup> T to T<sub>reg</sub> ratio) in the aorta. Moreover, T<sub>reg</sub> adoptive transfer ameliorates vascular adverse effects of both agents (31, 105). Modulating the shift from proinflammatory T cells to T<sub>reg</sub> may therefore be a potential therapeutic approach to suppress MR-mediated vascular inflammation and injury that promote hypertension.

## Conclusions

The emerging role of immune cells in MR-mediated disease is one of the many areas that have expanded the role of MR beyond physiological salt and water regulation. Moreover, MR and GR signaling in macrophages and other nonepithelial tissues appear to have opposing effects. Thus the net effect of MR and GR signaling in macrophages (*i.e.* the immune response) may be determined, in part, by the relative intracellular abundance of MR *vs.* GR ligands. Whereas the role of immune cells has been firmly established in other systemic disorders, and to a lesser extent in other cardiac disease models, our current understanding in MR-mediated cardiac models remains defi-

cient. Nevertheless, the discovery of the role of immune cells in MR-mediated cardiac remodeling and hypertension in several experimental mice models represents a new frontier in our research direction and understanding of its pathophysiology. Whether therapeutic selective immunomodulation, already in clinical practice for other autoimmune/inflammatory diseases, will be a useful novel approach in heart failure and hypertension remains to be seen.

## Acknowledgments

Address all correspondence and requests for reprints to: Dr. Morag J. Young, Prince Henry's Institute, of Medical Research, P.O. Box 5152, Clayton 3168, Australia. E-mail: morag.young@princehenrys.org.

This work was supported by National Health and Medical Research Council of Australia Grant 1010034 and the by the Victorian Government's Operational Infrastructure Support Program. J.Z.S. is supported by an Royal Australian College of Physicians Clinical Research Award and an Australian Post Graduate Award.

Disclosure Summary: The authors have nothing to declare.

## References

1. Mendis S, Puska P, Norrving B 2011 Global atlas on cardiovascular disease prevention and control, 2011 edition. Geneva, Switzerland: World Health Organization
2. Roger VL, Weston SA, Redfield MM, Hellermann-Homan JP, Killian J, Yawn BP, Jacobsen SJ 2004 Trends in heart failure incidence and survival in a community-based population. *JAMA* 292:344–350
3. Levy D, Kenchaiah S, Larson MG, Benjamin EJ, Kupka MJ, Ho KK, Murabito JM, Vasan RS 2002 Long-term trends in the incidence of and survival with heart failure. *N Engl J Med* 347:1397–1402
4. Curtis LH, Greiner MA, Hammill BG, Kramer JM, Whellan DJ, Schulman KA, Hernandez AF 2008 Early and long-term outcomes of heart failure in elderly persons, 2001–2005. *Arch Intern Med* 168:2481–2488
5. Bundkirchen A, Schwinger RH 2004 Epidemiology and economic burden of chronic heart failure. *Eur Heart J Suppl* 6:D57–D60
6. 2005 The shifting burden of cardiovascular disease in Australia, 2005 edition. National Heart Foundation of Australia
7. Rickard AJ, Morgan J, Tesch G, Funder JW, Fuller PJ, Young MJ 2009 Deletion of mineralocorticoid receptors from macrophages protects against deoxycorticosterone/salt-induced cardiac fibrosis and increased blood pressure. *Hypertension* 54:537–543
8. Bienvenu LA, Morgan J, Rickard AJ, Tesch GH, Cranston GA, Fletcher EK, Delbridge LM, Young MJ 2012 Macrophage mineralocorticoid receptor signaling plays a key role in aldosterone-independent cardiac fibrosis. *Endocrinology* 153:3416–3425
9. Usher MG, Duan SZ, Ivaschenko CY, Frieler RA, Berger S, Schütz G, Lumeng CN, Mortensen RM 2010 Myeloid mineralocorticoid receptor controls macrophage polarization and cardiovascular hypertrophy and remodeling in mice. *J Clin Invest* 120:3350–3364
10. Hollenberg SM, Weinberger C, Ong ES, Cerelli G, Oro A, Lebo R,

- Thompson EB, Rosenfeld MG, Evans RM 1985 Primary structure and expression of a functional human glucocorticoid receptor cDNA. *Nature* 318:635–641
11. Arriza JL, Weinberger C, Cerelli G, Glaser TM, Handelin BL, Housman DE, Evans RM 1987 Cloning of human mineralocorticoid receptor complementary DNA: structural and functional kinship with the glucocorticoid receptor. *Science* 237:268–275
  12. Wehling M 1997 Specific, nongenomic actions of steroid hormones. *Annu Rev Physiol* 59:365–393
  13. Cato AC, Nestl A, Mink S 2002 Rapid actions of steroid receptors in cellular signaling pathways. *Sci STKE* 2002:re9
  14. Funder JW 2005 Mineralocorticoid receptors: distribution and activation. *Heart Fail Rev* 10:15–22
  15. Edwards CR, Stewart PM, Burt D, Brett L, McIntyre MA, Sutanto WS, de Kloet ER, Monder C 1988 Localisation of 11  $\beta$ -hydroxysteroid dehydrogenase-tissue specific protector of the mineralocorticoid receptor. *Lancet* 2:986–989
  16. Funder JW, Pearce PT, Smith R, Smith AI 1988 Mineralocorticoid action: target tissue specificity is enzyme, not receptor, mediated. *Science* 242:583–585
  17. Walker BR 2007 Glucocorticoids and cardiovascular disease. *Eur J Endocrinol* 157:545–559
  18. Liu SL, Schmuck S, Chorazczyewski JZ, Gros R, Feldman RD 2003 Aldosterone regulates vascular reactivity: short-term effects mediated by phosphatidylinositol 3-kinase-dependent nitric oxide synthase activation. *Circulation* 108:2400–2406
  19. Min LJ, Mogi M, Li JM, Iwanami J, Iwai M, Horiuchi M 2005 Aldosterone and angiotensin II synergistically induce mitogenic response in vascular smooth muscle cells. *Circ Res* 97:434–442
  20. Jaffe IZ, Mendelsohn ME 2005 Angiotensin II and aldosterone regulate gene transcription via functional mineralocorticoid receptors in human coronary artery smooth muscle cells. *Circ Res* 96:643–650
  21. Mihailidou AS, Mardini M, Funder JW 2004 Rapid, nongenomic effects of aldosterone in the heart mediated by  $\epsilon$  protein kinase C. *Endocrinology* 145:773–780
  22. Chai W, Garrelds IM, Arulmani U, Schoemaker RG, Lamers JM, Danser AH 2005 Genomic and nongenomic effects of aldosterone in the rat heart: why is spironolactone cardioprotective? *Br J Pharmacol* 145:664–671
  23. Gordon RD, Stowasser M, Tunny TJ, Klemm SA, Rutherford JC 1994 High incidence of primary aldosteronism in 199 patients referred with hypertension. *Clin Exp Pharmacol Physiol* 21:315–318
  24. Rossi GP, Bernini G, Caliumi C, Desideri G, Fabris B, Ferri C, Ganzaroli C, Giacchetti G, Letizia C, Maccario M, Mallamaci F, Mannelli M, Mattarello MJ, Moretti A, Palumbo G, Parenti G, Porteri E, Semplicini A, Rizzoni D, Rossi E, Boscaro M, Pessina AC, Mantero F 2006 A prospective study of the prevalence of primary aldosteronism in 1,125 hypertensive patients. *J Am Coll Cardiol* 48:2293–2300
  25. Milliez P, Girerd X, Plouin PF, Blacher J, Safar ME, Mourad JJ 2005 Evidence for an increased rate of cardiovascular events in patients with primary aldosteronism. *J Am Coll Cardiol* 45:1243–1248
  26. Gomez-Sanchez EP 1986 Intracerebroventricular infusion of aldosterone induces hypertension in rats. *Endocrinology* 118:819–823
  27. Gómez-Sánchez EP, Venkataraman MT, Thwaites D, Fort C 1990 ICV infusion of corticosterone antagonizes ICV-aldosterone hypertension. *Am J Physiol* 258:E649–E653
  28. Skøtt O, Uhrenholt TR, Schjerning J, Hansen PB, Rasmussen LE, Jensen BL 2006 Rapid actions of aldosterone in vascular health and disease—friend or foe? *Pharmacol Ther* 111:495–507
  29. McCurley A, Jaffe IZ 2012 Mineralocorticoid receptors in vascular function and disease. *Mol Cell Endocrinol* 350:256–265
  30. McCurley A, Pires PW, Bender SB, Aronovitz M, Zhao MJ, Metzger D, Chambon P, Hill MA, Dorrance AM, Mendelsohn ME, Jaffe IZ 2012 Direct regulation of blood pressure by smooth muscle cell mineralocorticoid receptors. *Nat Med* 18:1429–1433
  31. Kasal DA, Barhoumi T, Li MW, Yamamoto N, Zdanovich E, Rehman A, Neves MF, Laurant P, Paradis P, Schiffrin EL 2012 T Regulatory lymphocytes prevent aldosterone-induced vascular injury. *Hypertension* 59:324–330
  32. Pitt B, Remme W, Zannad F, Neaton J, Martinez F, Roniker B, Bittman R, Hurley S, Kleiman J, Gatlin M 2003 Eplerenone, a selective aldosterone blocker, in patients with left ventricular dysfunction after myocardial infarction. *N Engl J Med* 348:1309–1321
  33. Pitt B, Zannad F, Remme WJ, Cody R, Castaigne A, Perez A, Palensky J, Wittes J 1999 The effect of spironolactone on morbidity and mortality in patients with severe heart failure. *N Engl J Med* 341:709–717
  34. Zannad F, McMurray JJ, Krum H, van Veldhuisen DJ, Swedberg K, Shi H, Vincent J, Pocock SJ, Pitt B 2011 Group E-HS eplerenone in patients with systolic heart failure and mild symptoms. *N Engl J Med* 364:11–21
  35. Rousseau MF, Gurné O, Duprez D, Van Mieghem W, Robert A, Ahn S, Galanti L, Ketelslegers JM 2002 Beneficial neurohormonal profile of spironolactone in severe congestive heart failure: results from the RALES neurohormonal substudy. *J Am Coll Cardiol* 40:1596–1601
  36. Funder JW 2010 Aldosterone and mineralocorticoid receptors in the cardiovascular system. *Prog Cardiovasc Dis* 52:393–400
  37. Ohtani T, Ohta M, Yamamoto K, Mano T, Sakata Y, Nishio M, Takeda Y, Yoshida J, Miwa T, Okamoto M, Masuyama T, Nonaka Y, Hori M 2007 Elevated cardiac tissue level of aldosterone and mineralocorticoid receptor in diastolic heart failure: beneficial effects of mineralocorticoid receptor blocker. *Am J Physiol Regul Integr Comp Physiol* 292:R946–R954
  38. Yoshida M, Ma J, Tomita T, Morikawa N, Tanaka N, Masamura K, Kawai Y, Miyamori I 2005 Mineralocorticoid receptor is overexpressed in cardiomyocytes of patients with congestive heart failure. *Congest Heart Fail* 11:12–16
  39. Sun Y, Zhang J, Lu L, Chen SS, Quinn MT, Weber KT 2002 Aldosterone-induced inflammation in the rat heart: role of oxidative stress. *Am J Pathol* 161:1773–1781
  40. Young M, Funder JW 2004 Eplerenone, but not steroid withdrawal, reverses cardiac fibrosis in deoxycorticosterone/salt-treated rats. *Endocrinology* 145:3153–3157
  41. Brilla CG, Weber KT 1992 Mineralocorticoid excess, dietary sodium, and myocardial fibrosis. *J Lab Clin Med* 120:893–901
  42. Hou J, Kato H, Cohen RA, Chobanian AV, Brecher P 1995 Angiotensin II-induced cardiac fibrosis in the rat is increased by chronic inhibition of nitric oxide synthase. *J Clin Invest* 96:2469–2477
  43. Oestreicher EM, Martinez-Vasquez D, Stone JR, Jonasson L, Roubanthisuk W, Mukasa K, Adler GK 2003 Aldosterone and not plasminogen activator inhibitor-1 is a critical mediator of early angiotensin II/NG-nitro-L-arginine methyl ester-induced myocardial injury. *Circulation* 108:2517–2523
  44. Cohn JN, Ferrari R, Sharpe N 2000 Cardiac remodeling—concepts and clinical implications: a consensus paper from an international forum on cardiac remodeling. Behalf of an International Forum on Cardiac Remodeling. *J Am Coll Cardiol* 35:569–582
  45. Ahokas RA, Warrington KJ, Gerling IC, Sun Y, Wodi LA, Herring PA, Lu L, Bhattacharya SK, Postlethwaite AE, Weber KT 2003 Aldosteronism and peripheral blood mononuclear cell activation. *Circ Res* 93:e124–e135
  46. Young MJ, Moussa L, Dilley R, Funder JW 2003 Early inflammatory responses in experimental cardiac hypertrophy and fibrosis: effects of 11 $\beta$ -hydroxysteroid dehydrogenase inactivation. *Endocrinology* 144:1121–1125
  47. Heymes C, Bendall JK, Ratajczak P, Cave AC, Samuel JL, Hasen-

- fuss G, Shah AM 2003 Increased myocardial NADPH oxidase activity in human heart failure. *J Am Coll Cardiol* 41:2164–2171
48. Li JM, Shah AM 2003 Mechanism of endothelial cell NADPH oxidase activation by angiotensin II. Role of the p47phox subunit. *J Biol Chem* 278:12094–12100
  49. Li JM, Gall NP, Grieve DJ, Chen M, Shah AM 2002 Activation of NADPH oxidase during progression of cardiac hypertrophy to failure. *Hypertension* 40:477–484
  50. Johar S, Cave AC, Narayanapanicker A, Grieve DJ, Shah AM 2006 Aldosterone mediates angiotensin II-induced interstitial cardiac fibrosis via a Nox2-containing NADPH oxidase. *FASEB J* 20:1546–1548
  51. Zia AA, Kamalov G, Newman KP, McGee JE, Bhattacharya SK, Ahokas RA, Sun Y, Gerling IC, Weber KT 2010 From aldosteronism to oxidative stress: the role of excessive intracellular calcium accumulation. *Hypertens Res* 33:1091–1101
  52. Fraccarollo D, Berger S, Galuppo P, Kneitz S, Hein L, Schütz G, Frantz S, Ertl G, Bauersachs J 2011 Deletion of cardiomyocyte mineralocorticoid receptor ameliorates adverse remodeling after myocardial infarction / clinical perspective. *Circulation* 123:400–408
  53. Rickard AJ, Bienvenu LA, Fletcher EK, Cranston GA, Shen JZ, Reichelt ME, Delbridge LM, Young MJ 29 October 2012 Cardiomyocyte mineralocorticoid receptors are essential for DOC/salt-mediated inflammation and cardiac fibrosis. *Hypertension* 10.1161/HYPERTENSIONAHA.112.203158
  54. Brilla CG, Zhou G, Matsubara L, Weber KT 1994 Collagen metabolism in cultured adult rat cardiac fibroblasts: response to angiotensin II and aldosterone. *J Mol Cell Cardiol* 26:809–820
  55. Weber KT, Brilla CG 1992 Factors associated with reactive and reparative fibrosis of the myocardium. *Basic Res Cardiol* 87(Suppl 1):291–301
  56. Young MJ, Funder JW 1996 The renin-angiotensin-aldosterone system in experimental mineralocorticoid-salt-induced cardiac fibrosis. *Am J Physiol* 271:E883–E888
  57. Young M, Head G, Funder J 1995 Determinants of cardiac fibrosis in experimental hypermineralocorticoid states. *Am J Physiol* 269:E657–E662
  58. Nagata K, Obata K, Xu J, Ichihara S, Noda A, Kimata H, Kato T, Izawa H, Murohara T, Yokota M 2006 Mineralocorticoid receptor antagonism attenuates cardiac hypertrophy and failure in low-aldosterone hypertensive rats. *Hypertension* 47:656–664
  59. Fejes-Tóth G, Náray-Fejes-Tóth A 2007 Early aldosterone-regulated genes in cardiomyocytes: clues to cardiac remodeling? *Endocrinology* 148:1502–1510
  60. Latouche C, Sainte-Marie Y, Steenman M, Castro Chaves P, Naray-Fejes-Toth A, Fejes-Toth G, Farman N, Jaisser F 2010 Molecular signature of mineralocorticoid receptor signaling in cardiomyocytes: from cultured cells to mouse heart. *Endocrinology* 151:4467–4476
  61. Lother A, Berger S, Gilsbach R, Rösner S, Ecke A, Barreto F, Bauersachs J, Schütz G, Hein L 2011 Ablation of mineralocorticoid receptors in myocytes but not in fibroblasts preserves cardiac function. *Hypertension* 57:746–754
  62. Armanini D, Strasser T, Weber PC 1985 Characterization of aldosterone binding sites in circulating human mononuclear leukocytes. *Am J Physiol* 248:E388–E390
  63. Herrada AA, Contreras FJ, Marini NP, Amador CA, González PA, Cortés CM, Riedel CA, Carvajal CA, Figueroa F, Michea LF, Fardella CE, Kalergis AM 2010 Aldosterone promotes autoimmune damage by enhancing Th17-mediated immunity. *J Immunol* 184:191–202
  64. Bergmann A, Eulenber C, Wellner M, Rolle S, Luft F, Kettritz R 2010 Aldosterone abrogates nuclear factor  $\kappa$ B-mediated tumor necrosis factor  $\alpha$  production in human neutrophils via the mineralocorticoid receptor. *Hypertension* 55:370–379
  65. Thieringer R, Le Grand CB, Carbin L, Cai TQ, Wong B, Wright SD, Hermanowski-Vosatka A 2001  $11\beta$ -Hydroxysteroid dehydrogenase type 1 is induced in human monocytes upon differentiation to macrophages. *J Immunol* 167:30–35
  66. Rocha R, Rudolph AE, Friedrich GE, Nachowiak DA, Kecec BK, Blomme EAG, McMahon EG, Delyani JA 2002 Aldosterone induces a vascular inflammatory phenotype in the rat heart. *Am J Physiol Heart Circ Physiol* 283:H1802–H1810
  67. Chow LH, Ye Y, Linder J, McManus BM 1989 Phenotypic analysis of infiltrating cells in human myocarditis. An immunohistochemical study in paraffin-embedded tissue. *Arch Pathol Lab Med* 113:1357–1362
  68. Vilahur G, Hernández-Vera R, Molins B, Casaní L, Duran X, Padró T, Badimon L 2009 Short-term myocardial ischemia induces cardiac modified C-reactive protein expression and proinflammatory gene (cyclo-oxygenase-2, monocyte chemoattractant protein-1, and tissue factor) upregulation in peripheral blood mononuclear cells. *J Thromb Haemost* 7:485–493
  69. Keidar S, Kaplan M, Pavlotzky E, Coleman R, Hayek T, Hamoud S, Aviram M 2004 Aldosterone administration to mice stimulates macrophage NADPH oxidase and increases atherosclerosis development. *Circulation* 109:2213–2220
  70. Lawrence T, Natoli G 2011 Transcriptional regulation of macrophage polarization: enabling diversity with identity. *Nat Rev Immunol* 11:750–761
  71. Murray PJ, Wynn TA 2011 Protective and pathogenic functions of macrophage subsets. *Nat Rev Immunol* 11:723–737
  72. Troidl C, Möllmann H, Nef H, Masseli F, Voss S, Szardien S, Willmer M, Rolf A, Rixe J, Troidl K, Kostin S, Hamm C, Elsässer A 2009 Classically and alternatively activated macrophages contribute to tissue remodelling after myocardial infarction. *J Cell Mol Med* 13:3485–3496
  73. Biswas SK, Mantovani A 2010 Macrophage plasticity and interaction with lymphocyte subsets: cancer as a paradigm. *Nat Immunol* 11:889–896
  74. Mosser DM, Edwards JP 2008 Exploring the full spectrum of macrophage activation. *Nat Rev Immunol* 8:958–969
  75. Barron L, Wynn TA 2011 Fibrosis is regulated by Th2 and Th17 responses and by dynamic interactions between fibroblasts and macrophages. *Am J Physiol Gastrointest Liver Physiol* 300:G723–G728
  76. Frieler RA, Meng H, Duan SZ, Berger S, Schütz G, He Y, Xi G, Wang MM, Mortensen RM 2011 Myeloid-specific deletion of the mineralocorticoid receptor reduces infarct volume and alters inflammation during cerebral ischemia. *Stroke* 42:179–185
  77. Chu PY, Zatta A, Kiriazis H, Chin-Dusting J, Du XJ, Marshall T, Kaye DM 2011 CXCR4 antagonism attenuates the cardiorenal consequences of mineralocorticoid excess. *Circ Heart Fail* 4:651–658
  78. Hofmann U, Beyersdorf N, Weirather J, Podolskaya A, Bauersachs J, Ertl G, Kerkau T, Frantz S 2012 Activation of CD4<sup>+</sup> T lymphocytes improves wound healing and survival after experimental myocardial infarction in mice. *Circulation* 125:1652–1663
  79. Zhu J, Yamane H, Paul WE 2010 Differentiation of effector CD4 T cell populations (\*). *Annu Rev Immunol* 28:445–489
  80. Obhrai JS, Oberbarnscheidt MH, Hand TW, Diggs L, Chalasani G, Lakkis FG 2006 Effector T cell differentiation and memory T cell maintenance outside secondary lymphoid organs. *J Immunol* 176:4051–4058
  81. O'Garra A, Gabryšová L, Spits H 2011 Quantitative events determine the differentiation and function of helper T cells. *Nat Immunol* 12:288–294
  82. Kanellakis P, Dinh TN, Agrotis A, Bobik A 2011 CD4<sup>+</sup>CD25<sup>+</sup>Foxp3<sup>+</sup> regulatory T cells suppress cardiac fibrosis in the hypertensive heart. *J Hypertens* 29:1820–1828
  83. Clausen BE, Burkhardt C, Reith W, Renkawitz R, Förster I 1999 Conditional gene targeting in macrophages and granulocytes using LysMcre mice. *Transgenic Res* 8:265–277



84. Brown NJ 2008 Aldosterone and vascular inflammation. *Hypertension* 51:161–167
85. Guzik TJ, Hoch NE, Brown KA, McCann LA, Rahman A, Dikalov S, Goronzy J, Weyand C, Harrison DG 2007 Role of the T cell in the genesis of angiotensin II-induced hypertension and vascular dysfunction. *J Exp Med* 204:2449–2460
86. Madhur MS, Lob HE, McCann LA, Iwakura Y, Blinder Y, Guzik TJ, Harrison DG 2010 Interleukin 17 promotes angiotensin II-induced hypertension and vascular dysfunction. *Hypertension* 55:500–507
87. Stowasser M 2001 New perspectives on the role of aldosterone excess in cardiovascular disease. *Clin Exp Pharmacol Physiol* 28:783–791
88. Jaffe IZ, Newell BG, Aronovitz M, Mohammad NN, McGraw AP, Perreault RE, Carmeliet P, Ehsan A, Mendelsohn ME 2010 Placental growth factor mediates aldosterone-dependent vascular injury in mice. *J Clin Invest* 120:3891–3900
89. De Ciuceis C, Amiri F, Brassard P, Endemann DH, Touyz RM, Schiffrin EL 2005 Reduced vascular remodeling, endothelial dysfunction, and oxidative stress in resistance arteries of angiotensin II-infused macrophage colony-stimulating factor-deficient mice: evidence for a role in inflammation in angiotensin-induced vascular injury. *Arterioscler Thromb Vasc Biol* 25:2106–2113
90. Wenzel P, Knorr M, Kossmann S, Stratmann J, Hausding M, Schuhmacher S, Karbach SH, Schwenk M, Yogev N, Schulz E, Oelze M, Grabbe S, Jonuleit H, Becker C, Daiber A, Waisman A, Münzel T 2011 Lysozyme M-positive monocytes mediate angiotensin II-induced arterial hypertension and vascular dysfunction. *Circulation* 124:1370–1381
91. Tsai S, Hollenbeck ST, Ryer EJ, Edlin R, Yamanouchi D, Kundi R, Wang C, Liu B, Kent KC 2009 TGF- $\beta$  through Smad3 signaling stimulates vascular smooth muscle cell proliferation and neointimal formation. *Am J Physiol Heart Circ Physiol* 297:H540–H549
92. Suwanabol PA, Seedial SM, Zhang F, Shi X, Si Y, Liu B, Kent KC 2012 TGF- $\beta$  and Smad3 modulate PI3K/Akt signaling pathway in vascular smooth muscle cells. *Am J Physiol Heart Circ Physiol* 302:H2211–H2219
93. Maddur MS, Miossec P, Kaveri SV, Bayry J 2012 Th17 cells: biology, pathogenesis of autoimmune and inflammatory diseases, and therapeutic strategies. *Am J Pathol* 181:8–18
94. Bettelli E, Carrier Y, Gao W, Korn T, Strom TB, Oukka M, Weiner HL, Kuchroo VK 2006 Reciprocal developmental pathways for the generation of pathogenic effector TH17 and regulatory T cells. *Nature* 441:235–238
95. Zhou L, Ivanov II, Spolski R, Min R, Shenderov K, Egawa T, Levy DE, Leonard WJ, Littman DR 2007 IL-6 programs T(H)-17 cell differentiation by promoting sequential engagement of the IL-21 and IL-23 pathways. *Nat Immunol* 8:967–974
96. Wilson NJ, Boniface K, Chan JR, McKenzie BS, Blumenschein WM, Mattson JD, Basham B, Smith K, Chen T, Morel F, Lecron JC, Kastelein RA, Cua DJ, McClanahan TK, Bowman EP, de Waal Malefyt R 2007 Development, cytokine profile and function of human interleukin 17-producing helper T cells. *Nat Immunol* 8:950–957
97. Fogg DK, Sibon C, Miled C, Jung S, Aucouturier P, Littman DR, Cumano A, Geissmann F 2006 A clonogenic bone marrow progenitor specific for macrophages and dendritic cells. *Science* 311:83–87
98. Geissmann F, Manz MG, Jung S, Sieweke MH, Merad M, Ley K 2010 Development of monocytes, macrophages, and dendritic cells. *Science* 327:656–661
99. Vinh A, Chen W, Blinder Y, Weiss D, Taylor WR, Goronzy JJ, Weyand CM, Harrison DG, Guzik TJ 2010 Inhibition and genetic ablation of the B7/CD28 T-cell costimulation axis prevents experimental hypertension/clinical perspective. *Circulation* 122:2529–2537
100. Littman DR, Rudensky AY 2010 Th17 and regulatory T cells in mediating and restraining inflammation. *Cell* 140:845–858
101. Mucida D, Park Y, Kim G, Turovskaya O, Scott I, Kronenberg M, Cheroutre H 2007 Reciprocal TH17 and regulatory T cell differentiation mediated by retinoic acid. *Science* 317:256–260
102. Yang J, Yang X, Zou H, Chu Y, Li M 2011 Recovery of the immune balance between Th17 and regulatory T cells as a treatment for systemic lupus erythematosus. *Rheumatology (Oxford)* 50:1366–1372
103. Kong N, Lan Q, Chen M, Wang J, Shi W, Horwitz DA, Quesniaux V, Ryffel B, Liu Z, Brand D, Zou H, Zheng SG 2012 Antigen-specific TGF- $\beta$ -induced regulatory T cells but not natural Tregs ameliorate autoimmune arthritis by shifting the balance of Th17 toward Treg cells. *Arthritis Rheum* 64:2548–2558
104. Lin FJ, Jiang GR, Shan JP, Zhu C, Zou J, Wu XR 2012 Imbalance of regulatory T cells to Th17 cells in IgA nephropathy. *Scand J Clin Lab Invest* 72:221–229
105. Barhoumi T, Kasal DA, Li MW, Shbat L, Laurant P, Neves MF, Paradis P, Schiffrin EL 2011 T regulatory lymphocytes prevent angiotensin II-induced hypertension and vascular injury. *Hypertension* 57:469–476
